# Supplementary material
Source: PubMed Central journal article supplement (PMC4301037)
Supplement: cb5006323_si_001.pdf [file cb5006323_si_001.pdf]

**Supporting Information for**

**Identification and structure-function analysis of**

**sub-family selective G protein-coupled receptor**

**kinase inhibitors**

by

Kristoff T. Homan, Kelly M. Larimore, Jonathan M. Elkins, Marta Szklarz, Stefan  
Knapp, and John J. G. Tesmer

## **Supporting Results**

**Structure-activity relationships.** The GRK2-selective indazole compounds typified by GSK180736A all contain three ring systems (Figure 1a): an indazole ring that forms two hydrogen bonds with the kinase domain hinge, a dihydropyrimidine-like ring that is relatively solvent exposed, and a terminal fluorophenyl moiety that docks in a pocket formed between the P-loop and the side chain of active site Lys220. These rings thus occupy the so-called adenine, ribose, and polyphosphate subsites of the active site, respectively. The biochemical data for GSK466317A, GSK317354A, GSK270822A, and GSK299115A (Table 2) can thus be interpreted on the basis of the co-crystal structure of GSK180736A with GRK2. GSK466317A, 2 logs less potent than GSK180736A, contains a chloro substituent on the indazole benzene ring, a dihydropyridone instead of a dihydropyrimidine, and a trifluoromethyl instead of a fluoro substituent on the phenyl ring. Manual modeling predicts that the chloro group can be accommodated, but its dihydropyridone ring will not be able to form a hydrogen bond with the P-loop and the trifluoromethyl group is likely too bulky to fit in the polyphosphate subsite. GSK270822A, which exhibits about the same potency as GSK466317A, has a dihydropyridone ring and a bulky terminal naphthalene group that is also likely excluded from the polyphosphate subsite. GSK317354A, about 1 log less potent than GSK180736A, retains a dihydropyrimidine central ring but has a trifluoromethyl pyridine in place of the carbonyl oxygen of GSK180736A. Because this group is modeled to project out of the active site, its lower potency may result from steric clashes with nearby residues or less favorable solvent interactions. The addition of a second halogen to the terminal phenyl of GSK299115A can likely be accommodated, but, as in the case of GSK466317A, its pyridone ring cannot form a hydrogen bond with the P-loop. Thus loss of the P-loop hydrogen bond can be construed to cause ~10-

fold less potency of inhibition. Interestingly, these chemical differences do not as strongly affect potency for inhibition of GRK1 and GRK5, and in some cases even seem to improve potency (Table 2). This could be interpreted to mean that these compounds do not bind to these enzymes in an analogous manner.

GSK2163632A also contains three ring systems, but they bind in a fundamentally different way than those of GSK180736A. Its central pyrrolopyrimidine ring system forms three hydrogen bonds with the hinge in the adenine subsite, and its thiophene carboxamide occupies the ribose subsite and interacts directly with the P-loop. The tetrahydroquinoline group extends along the hinge towards the large lobe where it is capped by residues in the AST loop. This last region is referred to as the “AST subsite” because it occupies a region of the active site that would normally contain residues from the AST in the active conformation of an AGC kinase. A similar region has been exploited to enhance the affinity of inhibitors of other kinases such as ERK5 <sup>(1)</sup>. Beneficial interactions with AST loop may thus prove to be critical for the development of inhibitors selective for GRK5. There are four related compounds in this study that provide the basis of a structure activity relationship: GSK2110263A, GSK2220400A, GSK1713088A, and GSK1326255A (Figure 1b). Absence of the gem-dimethyl substituent on the tetrahydroquinoline core of GSK2110263A decreases the potency for GRK1 inhibition, but does not affect potency against GRK5, confirming that the higher potency of GRK1 for GSK2163632A likely derives in part from the interactions with GRK1-specific residues in the AST. GSK2220400A lacks the gem-dimethyl group and has a methyl pyridine carboxamide in place of the thiophene carboxamide, which results in 100 fold lower potency against GRK1 but only a slight reduction in potency against GRK5. Thus it may be that the P-loop of GRK5 does not adopt the same “tucked under” conformation as seen in the GRK1 structure. Both GSK1713088A and GSK1326255A have a propyl piperidine moiety in place of the tetrahydroquinoline and a fluoro substituted pyridine carboxamide substituting for the thiophene carboxamide of GSK2163632A. These changes increase the IC<sub>50</sub> against GRK1 by 2-3 logs, but do not affect GRK5 inhibition. Thus, GRK5 seems less sensitive to changes in the ribose and AST subsites than GRK1. GRK2, like GRK5, is relatively insensitive to these modifications, and some of them even decrease the IC<sub>50</sub> (e.g. up to 1 log for GSK1326255A). Thus GRK2 may favor bulkier groups in its ribose subsite when a pyrrolopyrimidine is bound in the adenine subsite, although other explanations involving the other arm of the inhibitor are possible. Notably, PKA was not measurably inhibited by these compounds. This could reflect the unique sequence and the more ordered nature of the PKA AST region relative to those of GRKs <sup>(2)</sup>, which could more efficiently compete for binding with this class of inhibitors.

Supporting Table 1. DSF Screening Results for GRK2

| $\Delta T_m$<br>(°C) | Compound<br>Description | Compound<br>Supplier | Compound<br>Supplier ID | Compound Structure and SMILES String                                                                                                                                                     |
|----------------------|-------------------------|----------------------|-------------------------|------------------------------------------------------------------------------------------------------------------------------------------------------------------------------------------|
| 5.41                 | GSK PKI<br>collection   | GSK                  | GSK1007102B             | 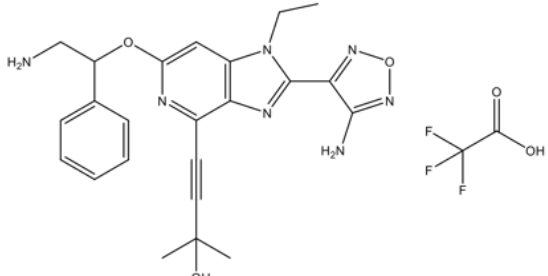<br><chem>OC(=O)C(F)(F)F.CCN(C1C(=NON2)C=2N)C=C(N=1)C1C#CC(C)(C)O)C=C(N=1)OC(CN)C(C=CC=C1)=C1</chem>   |
| 5.37                 | Staurosporine           | AXXORA               | S-9300                  | <br><chem>C(C(C(O1)(C)N(C=C(N(C12)C(=C1C=CC3)C=3)C13)C1=C(C=3C3=O)CN3)C(=CC=CC3)C1=3)OC)(C2)NC</chem> |
| 5.11                 | GSK PKI<br>collection   | GSK                  | GSK180736A              | <br><chem>CC(=C(C1C(=CC=C(F)C2)C=2)C(=O)NC(C=CC(NN=C2)=C23)=C3)NC(N1)=O</chem>                        |
| 4.83                 | GSK PKI<br>collection   | GSK                  | GSK299115A              | <br><chem>CC(=C(C1C(C=CC([Cl])=C2[Cl])=C2)C(=O)NC(C=CC(NN=C2)=C23)=C3)NC(C1)=O</chem>                |
| 3.82                 | GSK PKI<br>collection   | GSK                  | GSK270822A              | <br><chem>CC(=C(C1C(C=CC(=CC=CC2)C=23)=C3)C(=O)NC(C=CC(NN=C2)=C23)=C3)NC(C1)=O</chem>                |

|      |                    |     |             |                                                                                                                                                                                      |
|------|--------------------|-----|-------------|--------------------------------------------------------------------------------------------------------------------------------------------------------------------------------------|
| 3.78 | GSK PKI collection | GSK | GSK317354A  | 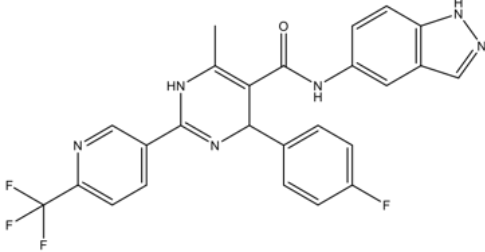<br><chem>CC(=C(C1C(=CC=C(F)C2)C=2)C(=O)NC(C=CC(NN=C2)=C23)=C3)NC(=N1)C(=CC=C1C(F)(F)F)C=N1</chem> |
| 3.29 | GSK PKI collection | GSK | GSK1326255A | <br><chem>CCCN1CCC(CC1)c1ccc(c(c1)OC)Nc1nc(c2cc[nH]c2n1)Nc1cc(ccc1C(N)=O)F</chem>                  |
| 2.94 | GSK PKI collection | GSK | GSK466317A  | <br><chem>CC(=C(C1C(=CC=C2C(F)(F)F)C=2)C(=O)NC(C=C(Cl)C(NN=C2)=C23)=C3)NC(C1)=O</chem>            |

## Supporting Table 2. DSF Screening Results for GRK5

| $\Delta T_m$<br>(°C) | Compound<br>Description                           | Compound<br>Supplier | Compound<br>Supplier ID | Compound Structure and SMILES String                                                                                                                                                        |
|----------------------|---------------------------------------------------|----------------------|-------------------------|---------------------------------------------------------------------------------------------------------------------------------------------------------------------------------------------|
| 11.95                | Staurosporine                                     | AXXORA               | S-9300                  | 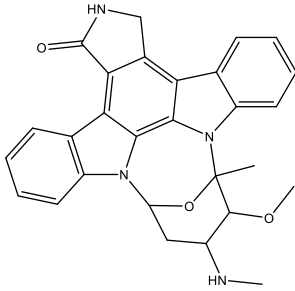<br><chem>C(C(C(O1)C)N(C(=C(N(C12)C(=C1C=CC3)C=3)C13)C1=C(C=3C3=O)CN3)C(=CC=CC3)C1=3)OC)(C2)NC</chem>     |
| 10.59                | Quercetin;<br>3,3',4',5,7-<br>Pentahydroxyflavone | Calbiochem<br>(EMD)  | 551600                  | <br><chem>c1cc(c(cc1C1=C(C(C2c(cc(cc2O1)O)O)=O)O)O)O)O</chem>                                             |
| 9.89                 | K252a                                             | Calbiochem<br>(EMD)  | 420298                  | <br><chem>C12C(C3N(C=1C=CC=C2)C1(C)C2(O)C(OC)=O)=C(C(=C(C=34)C(=C3N4C(O1)(C2)[H])C=CC=C3)C1=O)CN1</chem> |
| 9.25                 | GSK PKI collection                                | GSK                  | GSK2163632<br>A         | <br><chem>CC1(C)CCN(C(CN(C)C)=O)c2cc(c(cc12)OC)Nc1nc(c2cc[nH]c2n1)Nc1ccsc1C(N)=O</chem>                 |

|      |                                                                                                       |                     |                 |                                                                                                                                                                            |
|------|-------------------------------------------------------------------------------------------------------|---------------------|-----------------|----------------------------------------------------------------------------------------------------------------------------------------------------------------------------|
| 8.36 | GSK PKI collection                                                                                    | GSK                 | GSK2110236<br>A | 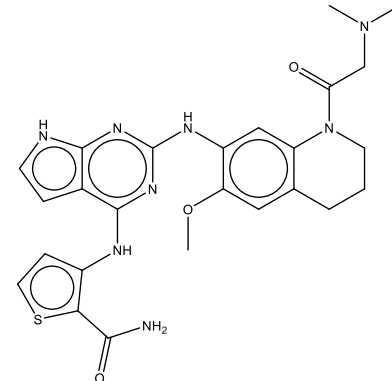<br><chem>CN(C)CC(N1CCCc2cc(c(cc12)Nc1nc(c2cc[nH]c2n1)Nc1ccs1C(N)=O)OC)=O</chem>         |
| 8.22 | 4,5,6,7-Tetrabromobenzo-triazole                                                                      | Calbiochem<br>(EMD) | 218697          | <br><chem>c1(c(c(c2c(c1[Br])nn[nH]2)[Br])[Br])[Br]</chem>                                |
| 8.13 | JAK Inhibitor I; 2-(1,1-Dimethylethyl)-9-fluoro-3,6-dihydro-7H-benz[h]-imidaz[4,5-f]isoquinolin-7-one | Calbiochem<br>(EMD) | 420099          | <br><chem>CC(C)(C)c1nc2c3ccc(cc3c3C(NC=Cc3c2[nH]1)=O)F</chem>                           |
| 7.37 | GSK PKI collection                                                                                    | GSK                 | GSK1713088<br>A | <br><chem>CCCN1CCC(CC1)Oc1cc(c(cc1[Cl])OC)Nc1nc(c2cc[nH]c2n1)Nc1cccc(c1C(N)=O)F</chem> |
| 6.93 | GSK PKI collection                                                                                    | GSK                 | GW693881A       | <br><chem>C(c1cccc(c1)F)Oc1ccc(cc1[Cl])Nc1c2c(cc(c3ccc[nH]3)s2)nc1.[Cl]</chem>         |

|      |                                                                                                                 |                     |                 |                                                                                                                                                                             |
|------|-----------------------------------------------------------------------------------------------------------------|---------------------|-----------------|-----------------------------------------------------------------------------------------------------------------------------------------------------------------------------|
| 6.87 | GSK PKI collection                                                                                              | GSK                 | GSK2220400<br>A | 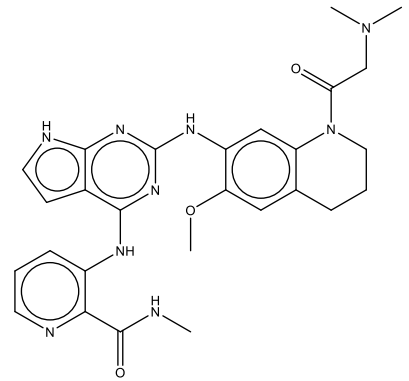<br><chem>CNC(c1c(cccn1)Nc1c2cc[nH]c2nc(Nc2cc3c(CCCN3C(CN(C)C)=O)cc2OC)n1)=O</chem>       |
| 6.71 | GSK PKI collection                                                                                              | GSK                 | GW416981X       | <br><chem>CC(C)COC(c1ccc2c(c1)C(=CNc1ccc(cc1)S(N)(=O)=O)C(=O)N2)=O</chem>                 |
| 6.48 | GSK PKI collection                                                                                              | GSK                 | GW806742X       | <br><chem>CN(c1ccc(cc1)NC(Nc1ccc(cc1)OC(F)(F)F)=O)c1ccnc(Nc2ccc(cc2)S(N)(=O)=O)n1</chem> |
| 6.45 | BIM I;<br>Bisindolylmaleimide<br>I; 2-[1-(3-Dimethylaminopropyl)-1H-indol-3-yl]-3-(1H-indol-3-yl)maleimide, HCl | Calbiochem<br>(EMD) | 203291          | <br><chem>CN(C)CCCn1cc(C2=C(C(=O)N2)O)c2c[nH]c3ccccc23)c2ccccc12.[Cl]</chem>            |
| 6.44 | Purvalanol A; 2-(1R-Isopropyl-2-hydroxyethylamino)-6-(3-chloroanilino)-9-isopropyl-purine                       | Calbiochem<br>(EMD) | 540500          | <br><chem>N(C(=C(C(=NC1NC(CO)C(C)C)N2C(C)C)N=C2)N=1)C(=CC(=CC1)[Cl])C=1</chem>          |

|      |                                                                              |                     |                 |                                                                                                                                                                               |
|------|------------------------------------------------------------------------------|---------------------|-----------------|-------------------------------------------------------------------------------------------------------------------------------------------------------------------------------|
| 6.35 | GSK PKI collection                                                           | GSK                 | GSK1326255<br>A | 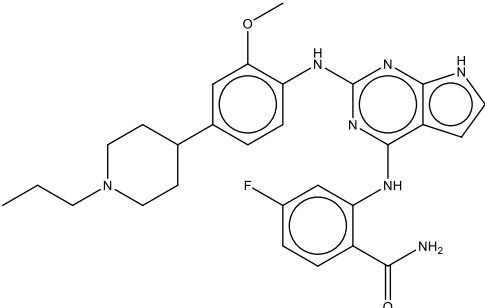<br><chem>CCCN1CCC(CC1)c1ccc(c(c1)OC)Nc1nc(c2cc[nH]c2n1)Nc1cc(ccc1C(N)=O)F</chem>           |
| 6.19 | BIM 10;<br>Bisindolylmaleimide<br>X, HCl                                     | AXXORA              | B-7204          | <br><chem>C=C(C(C(C1=CC2)=CC=2)=C(N1C1)CC(C1)CN)C(N1)=O)(C1=O)C1C(C=CC=C2)=C2N(C=1)C</chem> |
| 6.16 | 4-[(3-Bromophenyl)amino]-6,7-diaminoquinazoline                              | Calbiochem<br>(EMD) | 203697          | <br><chem>c1cc(cc(c1)[Br])Nc1c2cc(c(cc2ncn1)N)N</chem>                                     |
| 5.95 | H-1152; (S)-(+)-2-Methyl-1-[(4-methyl-5-isoquinoliny]sulfonyl]homopiperazine | Calbiochem<br>(EMD) | 555550          | <br><chem>N(CC(N1S(C=C(C=CC2)C3)C(=CN=3)C)C=2)(=O)=O)C)C CC1.[Cl].[Cl]</chem>             |
| 5.53 | Compound 52; 2-(2-Hydroxyethylamino)-6-(3-chloroanilino)-9-isopropylpurine   | Calbiochem<br>(EMD) | 234503          | <br><chem>CC(C)n1cnc2c(Nc3cccc(c3)[Cl])nc(NCCO)nc12</chem>                                |
| 5.48 | RO-3306                                                                      | AXXORA              | ALX-270-463     | <br><chem>C(c1cccs1)NC1=NC(C=Cc2ccc3c(cccn3)c2)S1=O</chem>                                |



|      |                      |                     |            |                                                                                                                                                                                 |
|------|----------------------|---------------------|------------|---------------------------------------------------------------------------------------------------------------------------------------------------------------------------------|
| 5.41 | Aurora/Cdk Inhibitor | Calbiochem<br>(EMD) | 189406     | 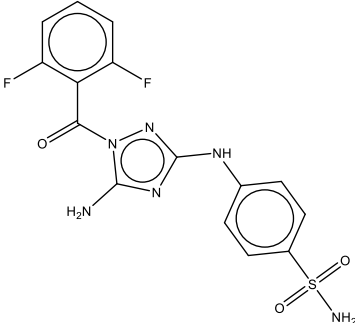<br><chem>c1cc(c(C(n2c(N)nc(Nc3ccc(cc3)S(N)(=O)=O)n2)=O)c(c1)F)F</chem>                       |
| 5.16 | Met Inhibitor        | Tocris              | 448101     | <br><chem>Cc1c(C(N2CCN(C)CC2)=O)c(C)[nH]c1C=C1C(Nc2ccc(cc12)S(N(C)c1cccc(c1)[Cl])=O)=O</chem> |
| 4.96 | GSK PKI collection   | GSK                 | GW795493X  | <br><chem>c1cc(cc(c1)NC(Nc1ccc(cc1)c1cc2c1c(N)ncn2)=O)C(F)(F)F</chem>                        |
| 4.92 | 9043251              | ChemBridge<br>e     | 9043251    | <br><chem>COc1ccc(cc1C(Nc1ccc2c(c1)cn[nH]2)=O)[Cl]</chem>                                   |
| 4.92 | GSK PKI collection   | GSK                 | GSK994854A | <br><chem>CCCN1CCC=C(C1)c1ccc(c(C)c1)Nc1nc(c2cc[nH]c2n1)Nc1cccc1C(N)=O</chem>               |
| 4.89 | Wee1/Chk1 inhibitor  | Calbiochem<br>(EMD) | 681637     | <br><chem>[H]O[H].c1ccc(cc1)c1cc2c(c3C(NC(c13)=O)=O)c1cc(ccc1[nH]2)O</chem>                 |

|      |                                                                                                                     |                  |               |                                                                                                                                                                                   |
|------|---------------------------------------------------------------------------------------------------------------------|------------------|---------------|-----------------------------------------------------------------------------------------------------------------------------------------------------------------------------------|
| 4.8  | (Z,E)-3-(Imidazol-4-ylmethylene)indolin-2-one                                                                       | Calbiochem (EMD) | 175580        | 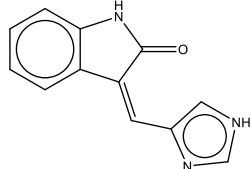<br><chem>C(=C1C(Nc2ccccc12)=O)c1c[nH]cn1</chem>                                                |
| 4.8  | GSK PKI collection                                                                                                  | GSK              | GW589933X     | <br><chem>C(=C1C(Nc2ccc3c(c12)scn3)=O)Nc1ccc(cc1)S(N)(=O)=O</chem>                              |
| 4.75 | GSK PKI collection                                                                                                  | GSK              | GSK1173862 A  | <br><chem>CCCN(CCCC1C(C=CC(NC(N=C(NC(=CC(F)=CC2)C=2C(N)=O)C(C=CN2)=C23)=N3)=C2OC)=C2)C1</chem> |
| 4.52 | STOCK4S-69416                                                                                                       | InterBioScreen   | STOCK4S-69416 | <br><chem>Cn1cc(C=C2C(NC(=O)S2)=O)c2ccccc12</chem>                                            |
| 4.5  | 10Z-Hymenialdisine; 4-(2-Amino-4-oxo-2-imidazolidin-5-ylidene)-2-bromo-4,5,6,7-tetrahydropyrrolo[2,3-c]azepin-8-one | Calbiochem (EMD) | 400085        | <br><chem>C1CNC(c2c(cc([nH]2)[Br])C1=C1C(N=C(N)N1)=O)=O</chem>                                |

|      |                    |        |              |                                                                                                                                                                               |
|------|--------------------|--------|--------------|-------------------------------------------------------------------------------------------------------------------------------------------------------------------------------|
| 4.43 | GSK PKI collection | GSK    | GW853606X    | 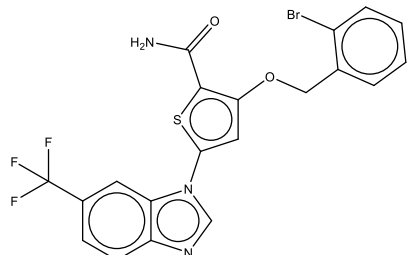<br><chem>C(c1ccccc1[Br])Oc1cc(n2cnc3ccc(cc23)C(F)(F)F)sc1C(N)=O</chem>                     |
| 4.33 | GSK PKI collection | GSK    | GW580496A    | <br><chem>CS(CCNc1ccc(c2ccc3c(c2)c(Nc2ccc(c(c2)[Br])OCc2ccccc2)ncn3)o1)(=O)=O.[Cl]</chem>   |
| 4.33 | GSK PKI collection | GSK    | GW799251X    | <br><chem>C(c1ccccc1F)Oc1ccc(cc1[Cl])Nc1c(C#Cc2ccnc(N)n2)cncn1</chem>                       |
| 4.25 | BAS 00253508       | Asinex | BAS 00253508 | <br><chem>C(=C1C(NC(=O)S1)=O)c1c[nH]c2ccccc12</chem>                                      |
| 4.25 | GSK PKI collection | GSK    | GW574783B    | <br><chem>CS(CCNc1ccc(c2ccc3c(c2)c(Nc2ccc(c(c2)[Cl])OCc2ccccc2)ncn3)o1)(=O)=O.[Cl]</chem> |
| 4.13 | Flavopiridol       | AXXORA | ALX-430      | <br><chem>C(=C(C1O)C(=C(C=1O)C(=C(C=C1C(=C(C=CC2)Cl)C=2)=O</chem>                         |

|      |                                                                 |                  |             |                                                                                                                                                                                |
|------|-----------------------------------------------------------------|------------------|-------------|--------------------------------------------------------------------------------------------------------------------------------------------------------------------------------|
| 4.08 | GSK PKI collection                                              | GSK              | GW694234A   | 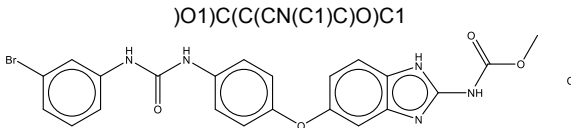<br><chem>COC(Nc1nc2cc(ccc2[nH]1)Oc1ccc(cc1)NC(Nc1cccc(c1)[Br])=O)=O.[Cl]</chem>             |
| 4.07 | GSK PKI collection                                              | GSK              | GW680908A   | <br><chem>COC(Nc1nc2cc(ccc2[nH]1)S(c1ccc(cc1)NC(Nc1cc(ccc1F)C(F)(F)F)=O)=O)=O.[Cl]</chem>    |
| 3.97 | GSK PKI collection                                              | GSK              | GW700494A   | <br><chem>CN1CCN(CCCNc2nc3ccc(cc3[nH]2)Oc2ccc(cc2)NC(Nc2cc(ccc2F)C(F)(F)F)=O)CC1.[Cl]</chem> |
| 3.92 | GSK PKI collection                                              | GSK              | GSK270822A  | <br><chem>CC(=C(C1C(C=CC(=CC=CC2)C=23)=C3)C(=O)NC(C=CC(NN=C2)=C23)=C3)NC(C1)=O</chem>        |
| 3.89 | GSK PKI Collection                                              | GSK              | GW300657X   | <chem>C(c1ccncc1)NC(c1ccc2c(c1)C(C(N2)=O)=NNc1ccc(cc1)S(N)(=O)=O)</chem>                                                                                                       |
| 3.88 | GSK PKI Collection                                              | GSK              | GW709042A   | <chem>c1ccc(cc1)C(Nc1nc2cc(ccc2[nH]1)Oc1ccc(cc1)NC(Nc1cc(cc1F)C(F)(F)F)=O)=O.[Cl]</chem>                                                                                       |
| 3.82 | GSK PKI Collection                                              | GSK              | GW796920X   | <chem>'Cc1ccc(cc1c1ccc(cc1)C(NCC1CC1)=O)NC(CC1CC1)=O</chem>                                                                                                                    |
| 3.72 | GSK PKI Collection                                              | GSK              | GW290597X   | <chem>C(CNC(c1ccc2c(c1)C(C(N2)=O)=NNc1ccc(cc1)S(N)(=O)=O)=O)Cn1ccnc1</chem>                                                                                                    |
| 3.6  | GSK PKI Collection                                              | GSK              | GW284372X   | <chem>C(c1ccccc1)Oc1ccc(cc1)Nc1c2cc(ccc2nnc1)c1ccc(O)1</chem>                                                                                                                  |
| 3.6  | Cdk1/2 Inhibitor III                                            | Calbiochem (EMD) | 217714      | <chem>c1cc(c(c1)F)NC(n1c(N)nc(Nc2ccc(cc2)S(N)(=O)=O)n1)=S</chem>                                                                                                               |
| 3.6  | Syk Inhibitor                                                   | Calbiochem (EMD) | 574711      | <chem>Cn1cc(C=C2C(Nc3ccc(cc23)S(N)(=O)=O)=O)c2ccccc12</chem>                                                                                                                   |
| 3.59 | GSK PKI Collection                                              | GSK              | GW607049C   | <chem>COC(Nc1nc2cc(ccc2[nH]1)Sc1ccc(cc1)NC(Nc1cc(ccc1F)C(F)(F)F)=O)=O.OS(O)(=O)=O</chem>                                                                                       |
| 3.59 | SU9516; 3-[1-(3H-imidazol-4-yl)-methoxy-1,3-dihydro-indol-2-one | Calbiochem (EMD) | 572650      | <chem>COc1ccc2c(c1)C(=Cc1c[nH]cn1)C(N2)=O</chem>                                                                                                                               |
| 3.58 | GSK PKI Collection                                              | GSK              | GSK2219385A | <chem>Cc1cc(c(cc1N(C)C(CN(C)C)=O)Nc1nc(c2cc[nH]c2n1)Nc1ccc(c1C(N)=O)F)OC</chem>                                                                                                |
| 3.55 | GSK PKI Collection                                              | GSK              | GSK299115A  | <chem>CC(=C(C1C(C=CC([Cl])=C2[Cl])=C2)C(=O)NC(C=CC(NN=C2)=C23)=C3)NC(C1)=O</chem>                                                                                              |
| 3.54 | GSK PKI Collection                                              | GSK              | GSK466314A  | <chem>CC(=NN1)C2=C1C=CC(NC(=O)C(=C(C)NC(=O)C1)C1C(C=CC1C(F)(F)F)=CC=1)=C2</chem>                                                                                               |
| 3.48 | GSK PKI Collection                                              | GSK              | GSK466317A  | <chem>CC(=C(C1C(=CC=C2C(F)(F)F)C=C2)C(=O)NC(C=C([Cl])C(NN=C2)=C23)=C3)NC(C1)=O</chem>                                                                                          |
| 3.43 | GSK PKI Collection                                              | GSK              | GSK1007102B | <chem>OC(=O)C(F)(F)F.CCN(C1C(=NON2)C=2N)C(=C(N=1)C1#CC(C)(C)O)C=C(N=1)OC(CN)C(C=CC=C1)=C1</chem>                                                                               |
| 3.36 | GSK PKI Collection                                              | GSK              | GW703087X   | <chem>CC(Nc1cccc(C#Cc2cncnc2Nc2ccc(c(c2)[Cl])OCc2ccccc2)F)c1=O</chem>                                                                                                          |
| 3.29 | GSK PKI Collection                                              | GSK              | GW616030X   | <chem>CS(CCN(CC#N)Cc1ccc(c2ccc3c(c2)c(Nc2ccc(c(c2)[Cl])OCc2ccccc2)F)ncn3)o1)=(O)=O</chem>                                                                                      |
| 3.28 | PDK/AKT inhibitor                                               | Calbiochem (EMD) | 521275      | <chem>c1ccc2c(c1)C(c1c2nc2nncn1)=O</chem>                                                                                                                                      |
| 3.27 | GSK PKI Collection                                              | GSK              | GW633459A   | <chem>C(CS(c1ccccc1)(=O)=O)NCc1ccc(c2ccc3c(c2)c(Nc2ccc(c(c</chem>                                                                                                              |

|      |                                                                                             |                  |                      |                                                                                                               |
|------|---------------------------------------------------------------------------------------------|------------------|----------------------|---------------------------------------------------------------------------------------------------------------|
|      |                                                                                             |                  |                      | 2)[Cl])OCc2cccc(c2)F)ncn3)o1.[Cl]                                                                             |
| 3.25 | GSK PKI Collection                                                                          | GSK              | GW701427A            | COC(Nc1nc2cc(ccc2[nH]1)Oc1ccc(cc1)NC(Nc1cccc(c1)C(O)=O)=O)=O.[Cl]                                             |
| 3.25 | GSK PKI Collection                                                                          | GSK              | GR105659X            | C1Cc2cc(ccc2C1=C1C(Nc2cccc12)=O)O                                                                             |
| 3.24 | STO-609                                                                                     | Tocris           | 1551                 | c1ccc2c(c1)nc1c3ccc(C(O)=O)c4cccc(C(n12)=O)c34                                                                |
| 3.19 | GSK PKI Collection                                                                          | GSK              | GW770249X            | c1cc(ccc1c1cc2c1c(N)ncn2)NC(Nc1cc(ccc1F)C(F)(F)F)=O                                                           |
| 3.16 | GSK PKI Collection                                                                          | GSK              | GW785804X            | c1cc2c(ccc(c3c(c4ccc(cc4)F)nc(N)s3)n2)nc1C(Cn1ccnc1)Cn1cc(C2=C(C(NC2=O)=O)Nc2cccc2)c2cccc12                   |
| 3.13 | PKC beta inhibitor Oxindole I; 3-(1H-Pyrrol-2-ylmethylene)-1,3-dihydroindol-2-one BIM 4; 8; | Calbiochem (EMD) | 539654               |                                                                                                               |
| 3.11 | bisindolylmaleimide IV                                                                      | Calbiochem (EMD) | 499600               | C(=C1C(Nc2cccc12)=O)c1ccc[nH]1                                                                                |
| 3.11 |                                                                                             | AXXORA           | ALX-270-052-M001 AOP | c1ccc2c(c1)c(c[nH]2)C1=C(C(NC1=O)=O)c1c[nH]c2cccc12                                                           |
| 3.07 | AOP 15805704                                                                                | Asinex           | 15805704 GSK1220512  | C(=C(C(C=CC1F)=CC=1)N1)(C(C1=NC1)=CC=1)CN(CC(C1)O)CC1                                                         |
| 3.05 | GSK PKI Collection                                                                          | GSK              | A                    | CC(C)N1CCN(CC1)c1ccc(c(c1)OC)Nc1nc(c2cc[nH]c2n1)Nc1ccc(cc1C(N)=O)F                                            |
| 3.03 | GSK PKI Collection                                                                          | GSK              | GW300660X            | C(CNC(c1ccc2c(c1)C(C(N2)=O)=NNc1ccc(cc1)S(N)(=O)=O)=O)c1c[nH]cn1                                              |
| 2.98 | 3-(2-Chloro-3-indolylmethylene)-1,3-dihydroindol-2-one                                      | Calbiochem (EMD) | 217695               | C(=C1C(Nc2cccc12)=O)c1c2cccc2[nH]c1[Cl]                                                                       |
| 2.98 | PI3Kg inhib                                                                                 | Calbiochem (EMD) | 528106               | C(=C1C(NC(=O)S1)=O)c1ccc2c(c1)ncn2                                                                            |
| 2.97 | GSK PKI Collection                                                                          | GSK              | GSK192082A           | CCNC(=O)OC(CNC1C#CC(=CC(N=CN2)=C3C=2NC(C=CC(OCC(C=CC=C2F)=C2)=C2[Cl])=C2)S3)C1                                |
| 2.96 | GSK PKI Collection                                                                          | GSK              | GW831090X            | c1cc(cc(c1)O)c1cc(Nc2ccc(cc2)S(N)(=O)=O)[nH]n1                                                                |
| 2.93 | GSK PKI Collection                                                                          | GSK              | GSK238063A           | CN(C)C(=O)OC(CNC1C#CC(=CC(N=CN2)=C3C=2NC(C=CC(OCC(C=CC=C2F)=C2)=C2[Cl])=C2)S3)C1                              |
| 2.9  | Apigenin; 4',5,7-Trihydroxyflavone                                                          | Calbiochem (EMD) | 178278 BAS           | C1=C(c2ccc(cc2)O)Oc2cc(cc(c2C1=O)O)O                                                                          |
| 2.87 | BAS 09687195                                                                                | Asinex           | 09687195             | C(=C1C(NC(=O)S1)=O)c1ccc(c2nc3cccc3s2)o1                                                                      |
| 2.86 | GSK PKI Collection                                                                          | GSK              | SB-736302            | C1CC1n1c2ccncc2nc1c1c(N)non1                                                                                  |
| 2.82 | GSK PKI Collection                                                                          | GSK              | GW441756X            | Cn1cc(C=C2C(Nc3cccnc23)=O)c2cccc12                                                                            |
| 2.8  | GSK PKI Collection                                                                          | GSK              | GW708336X            | C1CC1Nc1nccc(c2cnn3c2ccc(n3)N2CCOCC2)n1                                                                       |
| 2.78 | SB216763                                                                                    | AXXORA           | 10010246             | Cn1cc(C2=C(C(NC2=O)=O)c2ccc(cc2[Cl])[Cl])c2cccc12                                                             |
| 2.68 | GSK PKI Collection                                                                          | GSK              | GW759710A            | c1cc(cc(c1)Nc1nccc(Nc2cccc(c2)F)n1)C(N)=O.[Cl]CS(c1cccc(CNc2c(cnc(Nc3ccc4c(CCC(N4)=O)c3)n2)C(F)(F)F)c1)(=O)=O |
| 2.67 | PF 573228                                                                                   | Tocris           | 3239                 |                                                                                                               |
| 2.66 | GSK PKI Collection                                                                          | GSK              | GW439255X            | Cc1cc(cc(C)c1C=Cc1cc(cnc1)C(=O)OC(C)(C)C)O                                                                    |
| 2.63 | GSK PKI Collection                                                                          | GSK              | SB-476429-A          | C(c1ccc(cc1)c1nc(c2ccc(c(c2)O)[Cl])c(c2ccncc2)[nH]1)N.[Cl]                                                    |
| 2.58 | GSK PKI Collection                                                                          | GSK              | GW566221A            | CS(CCNc1cc(c2ccc3c(c2)c(Nc2ccc(cc2)OCc2cccc2)ncn3)oc1)(=O)=O.[Cl]                                             |
| 2.57 | IKK-2 Inhibitor VI                                                                          | Calbiochem (EMD) | 401483               | c1ccc(cc1)c1cc(C(N)=O)c(NC(N)=O)s1                                                                            |
| 2.51 | GSK PKI Collection                                                                          | GSK              | GW659386A            | COC(Nc1nc2cc(ccc2[nH]1)Oc1cccc(c1)NC(Nc1cc(ccc1F)C(F)(F)F)=O)=O.[Cl]                                          |
| 2.46 | Trihydroxyisoflavone                                                                        | Calbiochem (EMD) | 345834               | C1=C(C(c2c(cc(c2O1)O)O)=O)c1ccc(cc1)O                                                                         |
| 2.43 | Syk Inhibitor II                                                                            | Calbiochem (EMD) | 574712               | C(CNc1ncc(C(N)=O)c(Nc2cccc(c2)C(F)(F)F)n1)N                                                                   |
| 2.42 | IGF-1R Inhibitor II                                                                         | Calbiochem (EMD) | 407248               | Cc1cc(c2cccc2n1)NC(Nc1cc(ccc1OC)[Cl])=O                                                                       |
| 2.4  | GSK PKI Collection                                                                          | GSK              | GW284408X            | C(=C1C(Nc2cccc12)=O)Nc1ccc2c(c1)NC(N2)=O                                                                      |
| 2.34 | GSK PKI Collection                                                                          | GSK              | GW559768X            | Cc1ccc(cc1Nc1ccnc2ccc(cc12)S(C)(=O)=O)O                                                                       |
| 2.32 | GSK PKI Collection                                                                          | GSK              | GW683134A            | c1cc(C(Nc2nc3cc(ccc3[nH]2)Oc2ccc(cc2)NC(Nc2cc(ccc2F)C(F)(F)F)=O)=O)oc1.[Cl]                                   |
| 2.29 | GSK PKI Collection                                                                          | GSK              | GSK317354A           | CC(=C(C1C(=CC=C(F)C2)C=2)C(=O)NC(C=CC(NN=C2)=C23)=C3)NC(=N1)C(=CC=C1C(F)(F)F)C=N1                             |
| 2.27 | GSK PKI Collection                                                                          | GSK              | GW781673X            | C(c1ccc(cc1)[Cl])Nc1nccc(c2cnn3c2cccn3)n1                                                                     |
| 2.22 | GSK PKI Collection                                                                          | GSK              | GW683768X            | CCc1c(c2ccnc(NC3CC3)n2)c2ccnnc1                                                                               |
| 2.22 | 5-Iodotubercidin; 4-                                                                        | Calbiochem       | 407900               |                                                                                                               |

|      |                                                                                                                                           |                  |                  |                                                                                                |
|------|-------------------------------------------------------------------------------------------------------------------------------------------|------------------|------------------|------------------------------------------------------------------------------------------------|
|      | Amino-5-iodo-7-(b-D-ribofuranosyl)pyrrolo [2,3-d]pyrimidine TX-1918; 2-((3,5-dimethyl-4-hydroxyphenyl)methylene)-4-cyclopentene-1,3-dione | (EMD)            |                  | <chem>C(=NC=N1)C(=C1N(C1)C(C(C(C2CO)O)O)O2)C=1)N</chem>                                        |
| 2.21 | JNK Inhibitor II; SAPK Inhibitor II; Anthra[1,9-cd]pyrazol-6(2H)-one                                                                      | Calbiochem (EMD) | 655203           | <chem>Cc1cc(C=C2C(C=CC2=O)=O)cc(C)c1O</chem>                                                   |
| 2.19 | ART 16145605                                                                                                                              | Calbiochem (EMD) | 420119<br>ART    | <chem>c1ccc2c(c1)C(c1cccc3c1c2n[nH]3)=O</chem>                                                 |
| 2.17 | GSK PKI Collection                                                                                                                        | Asinex           | 16145605         | <chem>CCN(CC)Cc1c2cccnc2[nH]c1c1ccncc1</chem>                                                  |
| 2.14 | GSK PKI Collection                                                                                                                        | GSK              | GW622055X<br>AOP | <chem>CCS(c1ccc(c(c1)Nc1ncc(c2cccc2[Cl])o1)OC)(=O)=O</chem>                                    |
| 2.12 | GSK PKI Collection                                                                                                                        | Asinex           | 16327220         | <chem>CCN(CC(C)C)Cc1c2cccnc2[nH]c1c1ccc(cc1)F</chem>                                           |
| 2.11 | GSK PKI Collection                                                                                                                        | GSK              | GSK969786A       | <chem>C(c1cccc(c1)F)Oc1ccc(cc1[Cl])Nc1c2cc(c3cccc3)sc2ncn1</chem>                              |
| 2.08 | GSK PKI Collection                                                                                                                        | GSK              | GW396574X<br>BAS | <chem>CC(C)=Cc1cccc2c1C(C(N2)=O)=NNc1ccc(cc1)S(N)(=O)=O</chem>                                 |
| 2.08 | BAS 00385194                                                                                                                              | Asinex           | 00385194         | <chem>C(c1ccc(cc1[Cl])[Cl])Oc1cccc(C=C2C(NC(=O)S2)=O)c1</chem>                                 |
| 2.06 | GSK PKI Collection                                                                                                                        | GSK              | GSK326090A       | <chem>CC(OC(C=C1N(C=N2)C3=C2C=CC(OCC(CCN(C)C2)C2)=C3)=C(S1)C(N)=O)C(=CC=CC1)C=1C(F)(F)F</chem> |
| 2.03 | GSK PKI Collection                                                                                                                        | GSK              | SB-739452        | <chem>C1CC1C(Nc1c2cc(c(c3cccc3)nc2[nH]n1)[Br])=O</chem>                                        |
| 2.01 | Water                                                                                                                                     |                  |                  | <chem>O</chem>                                                                                 |

18 compounds that are not commercially available are omitted from the table.

## Supporting References

1. Elkins, J. M., Wang, J., Deng, X., Pattison, M. J., Arthur, J. S., Erazo, T., Gomez, N., Lizcano, J. M., Gray, N. S., and Knapp, S. (2013) X-ray crystal structure of ERK5 (MAPK7) in complex with a specific inhibitor, *J Med Chem* 56, 4413-4421.
2. Boguth, C. A., Singh, P., Huang, C. C., and Tesmer, J. J. (2010) Molecular basis for activation of G protein-coupled receptor kinases, *EMBO J* 29, 3249-3259.
